# Supplementary material for: Characteristics and sources of carbonaceous aerosols from Shanghai, China
Source: Copernicus journal article supplement (doi:10.5194/acp-13-803-2013), 2013-01-22
Supplement: Supplementary file 1 [file acp-13-803-2013-supplement.pdf]

1 **Supplementary Figures**

2 Figure 1 -4 The ratios for  $ANT/(ANT+PHE)$ ,  $FLU/(FLU+PYR)$ ,  $IcdP/(IcdP+BghiP)$ ,

3  $BaA/(BaA+CHR)$  in  $PM_{2.5}$ , respectively

4

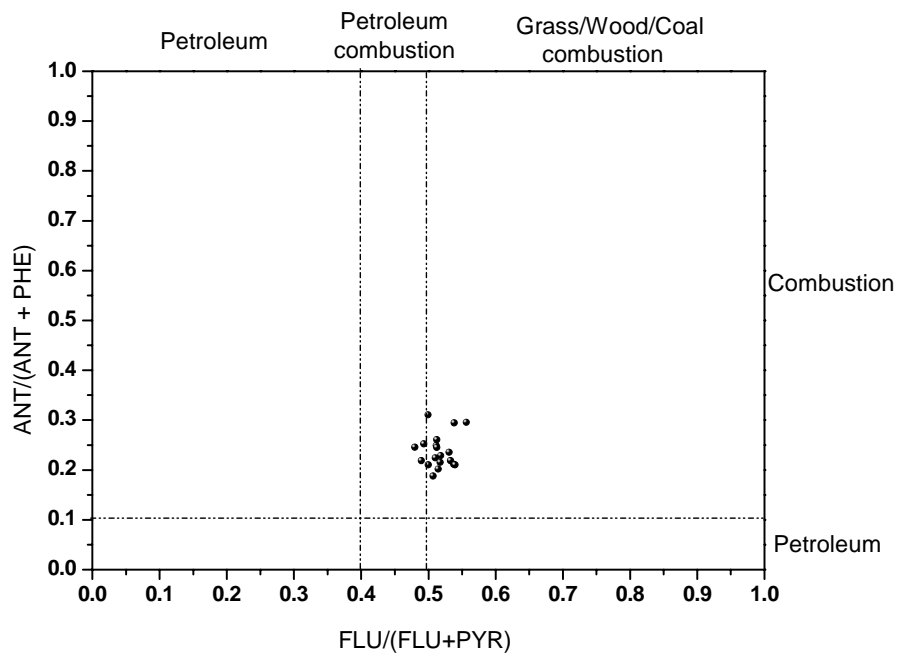

5

6 Figure 1

7

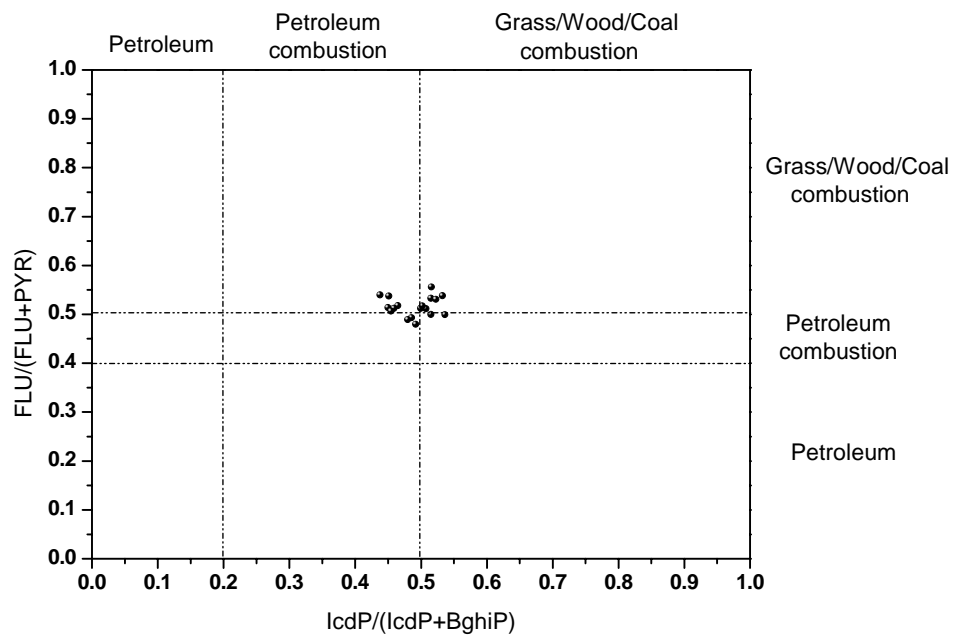

8

9 Figure 2

10

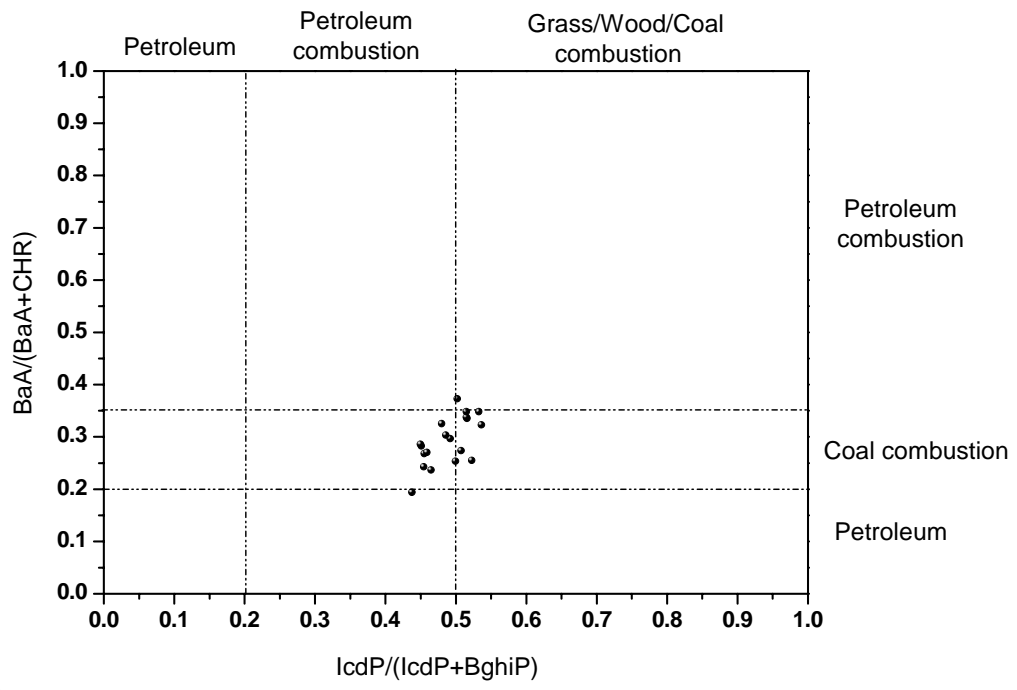

11  
 12 Figure 3  
 13

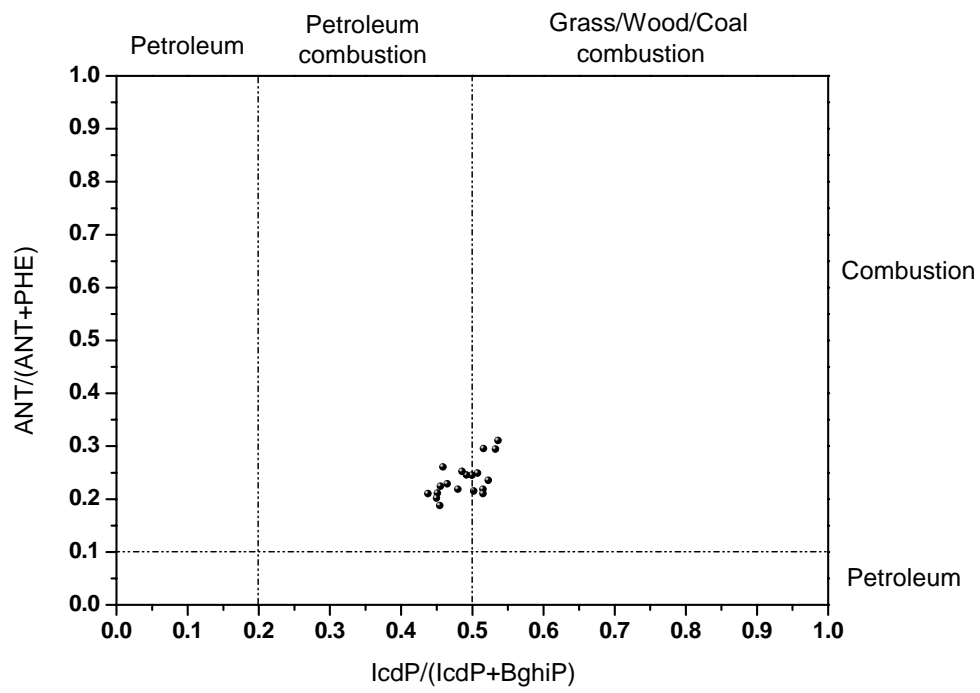

14

15 Figure 4

16

17
